# Supplementary material for: Selective Desulfonylation of Oxidized Sulfur Compounds in Crude Oil by Alcohol-Mediated Nucleophilic Attack Studied by XANES and XRF Spectroscopy
Source: Preprints.org preprint supplement (doi:10.20944/preprints201609.0075.v1), 2016-09-22
Supplement: Supplementary file 1 [file supplementary]

# Supplementary Materials: Selective Desulfonation of Oxidized Sulfur Compounds in Crude Oil by Alcohol-Mediated Nucleophilic Attack Studied by XANES and XRF Spectroscopy

Jonathan Rankin, Kyle Litz, Sarah Briggs, Trent McCaskill, Michael Scudder, Syed Khalid and Raman Budhani

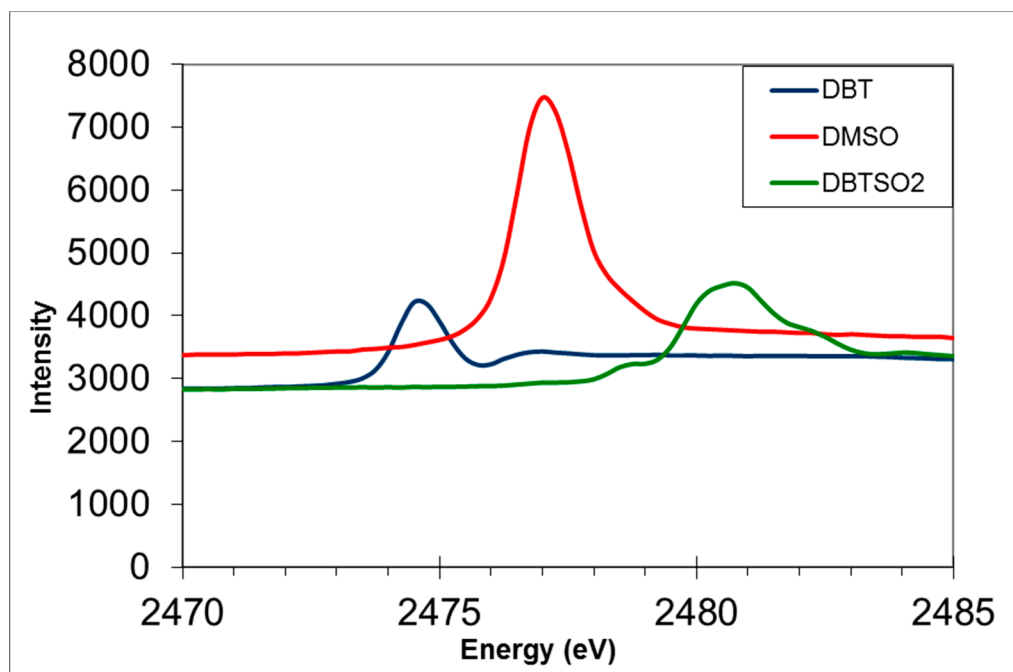

**Figure S1.** XANES Spectra of sulfur standards: dibenzothiophene (DBT), dimethyl sulfoxide (DMSO) and dibenzothiophene sulfone (DBTSO<sub>2</sub>).

**Table S1.** Feed oil properties.

| Oil                   | Density<br>(g/mL at<br>15°C) | Viscosity<br>(cP) | Sulfur<br>(wt%) | Nitrogen<br>(ppm) | Vanadium<br>(ppm) | Nickel<br>(ppm) | Iron<br>(ppm) |
|-----------------------|------------------------------|-------------------|-----------------|-------------------|-------------------|-----------------|---------------|
| US Gulf Coast Diesel  | N/A                          | N/A               | 2.00%           | N/A               | N/A               | N/A             | N/A           |
| Athabasca Bitumen #1  | 1.0355                       | 699.7<br>(100°C)  | 6.50%           | 4900              | 240               | 90              | 24            |
| US Gulf Coast Gas Oil | 0.9206                       | 103.8<br>(21°C)   | 1.20%           | 2300              | <1                | <1              | <1            |
| Arabian Whole Crude   | 0.8956                       | 41.9<br>(21°C)    | 3.15%           | 1500              | 56                | 16              | <1            |
| Athabasca Bitumen #2  | 0.9930                       | 180.1<br>(100°C)  | 4.37%           | 3300              | 137               | 54              | 11            |
| Athabasca Bitumen #3  | 1.0090                       | N/A               | 4.80%           | 3900              | 236               | 93              | 4             |

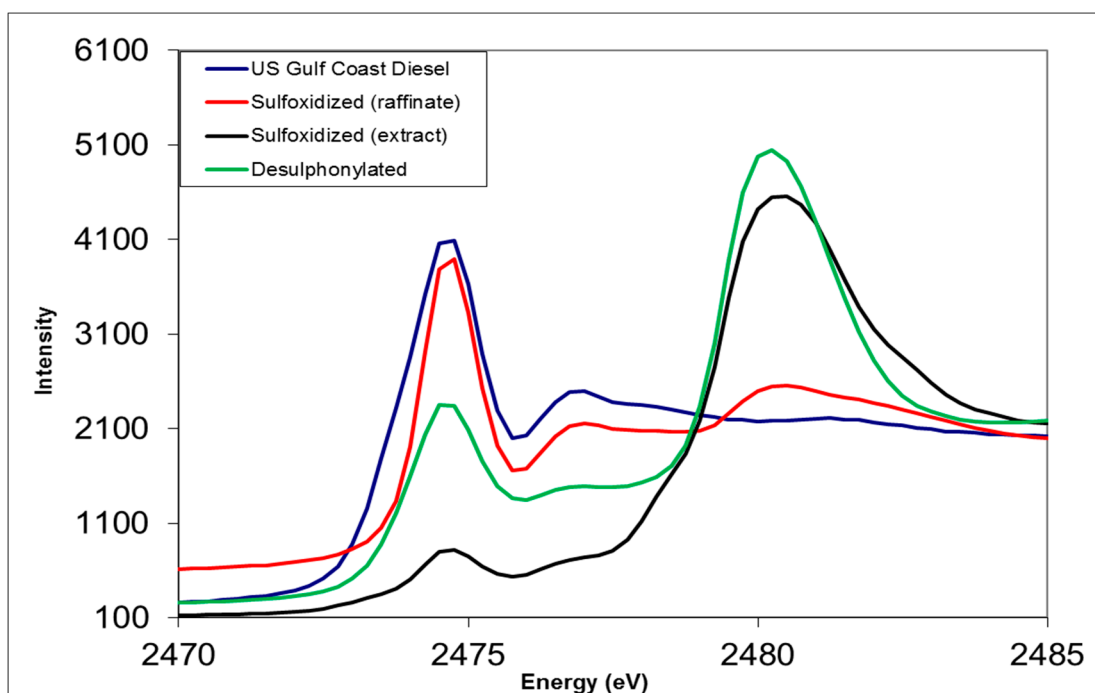

**Figure S2.** XANES spectra of US Gulf Coast Diesel.

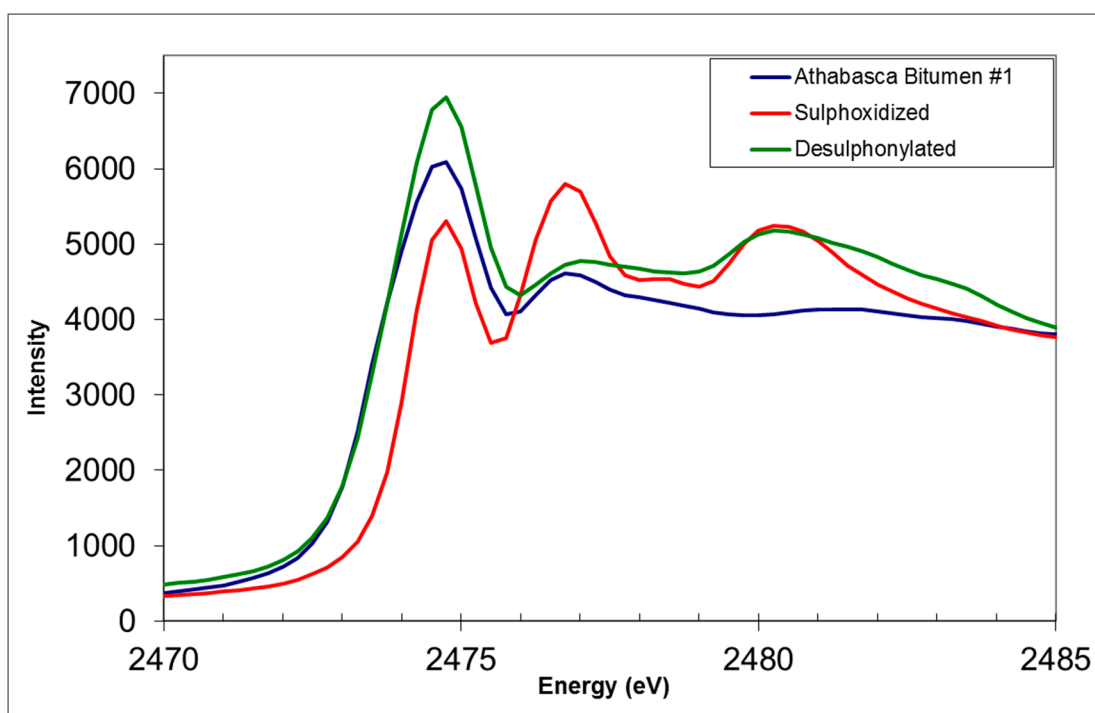

**Figure S3.** XANES Spectra of Athabasca Bitumen #1.

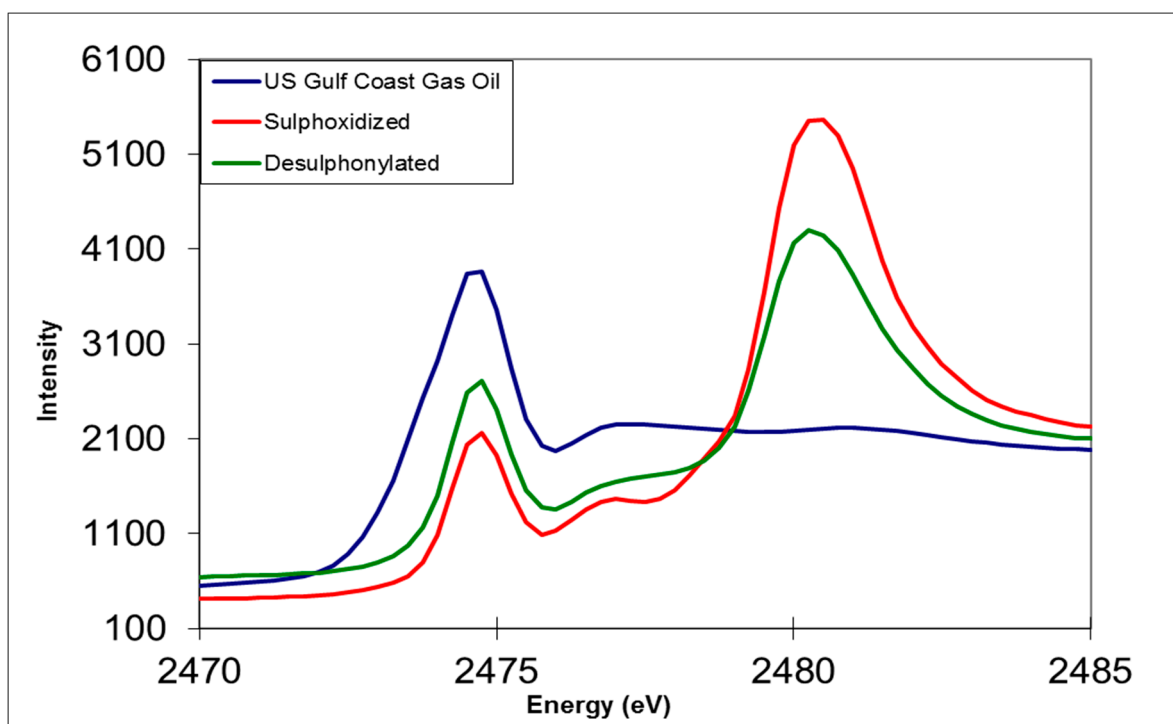

**Figure S4.** XANES Spectra of US Gulf Coast Gas Oil.

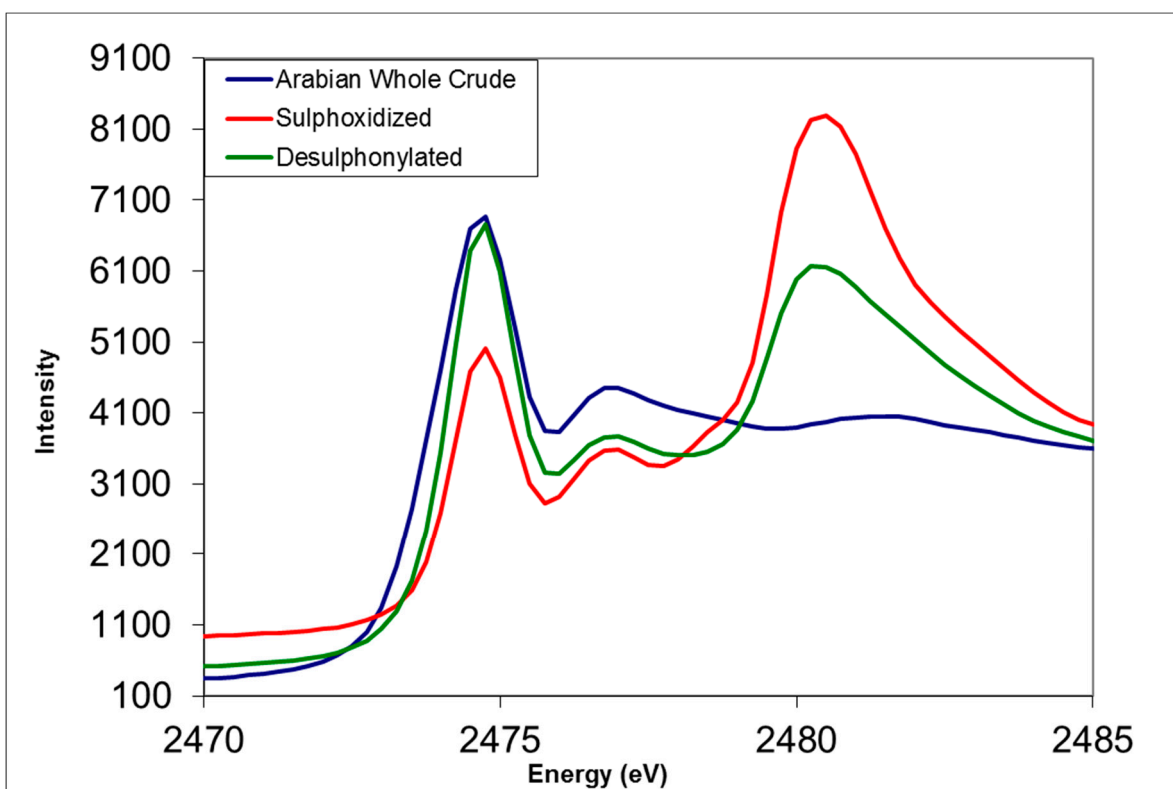

**Figure S5.** XANES Spectra of Arabian Whole Crude.

## XANES Spectra of Athabasca Bitumen #2

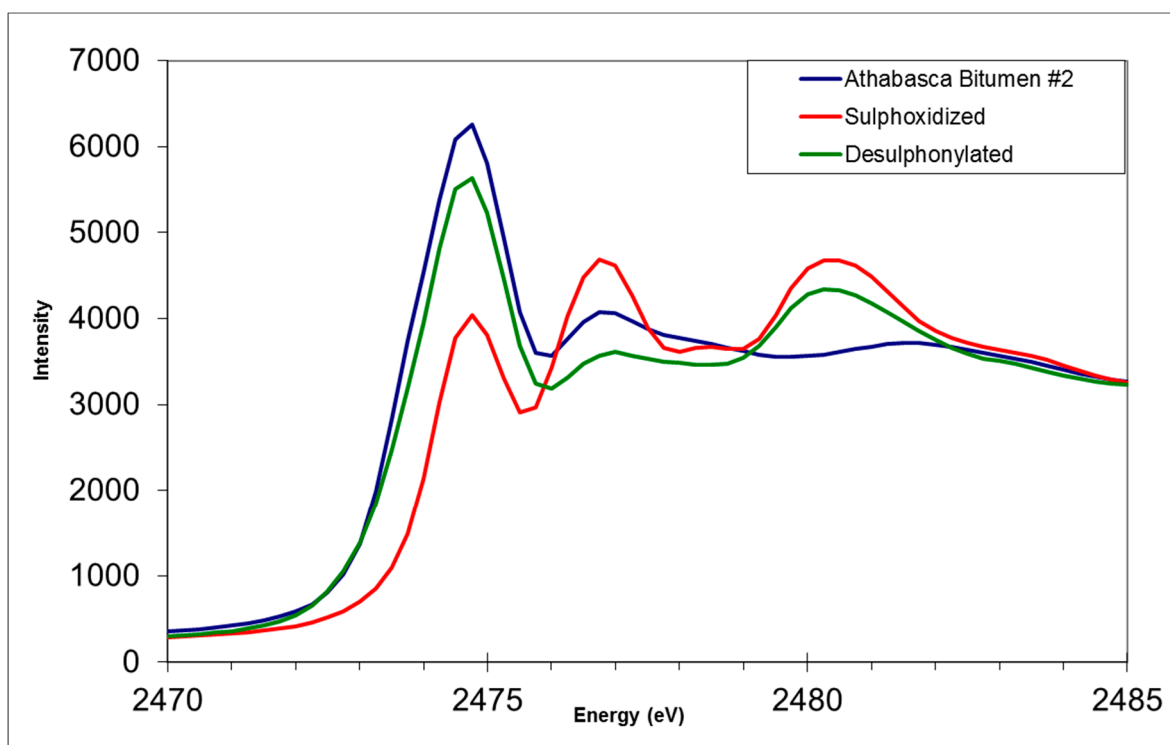**Figure S6.** XANES Spectra of Athabasca Bitumen #2.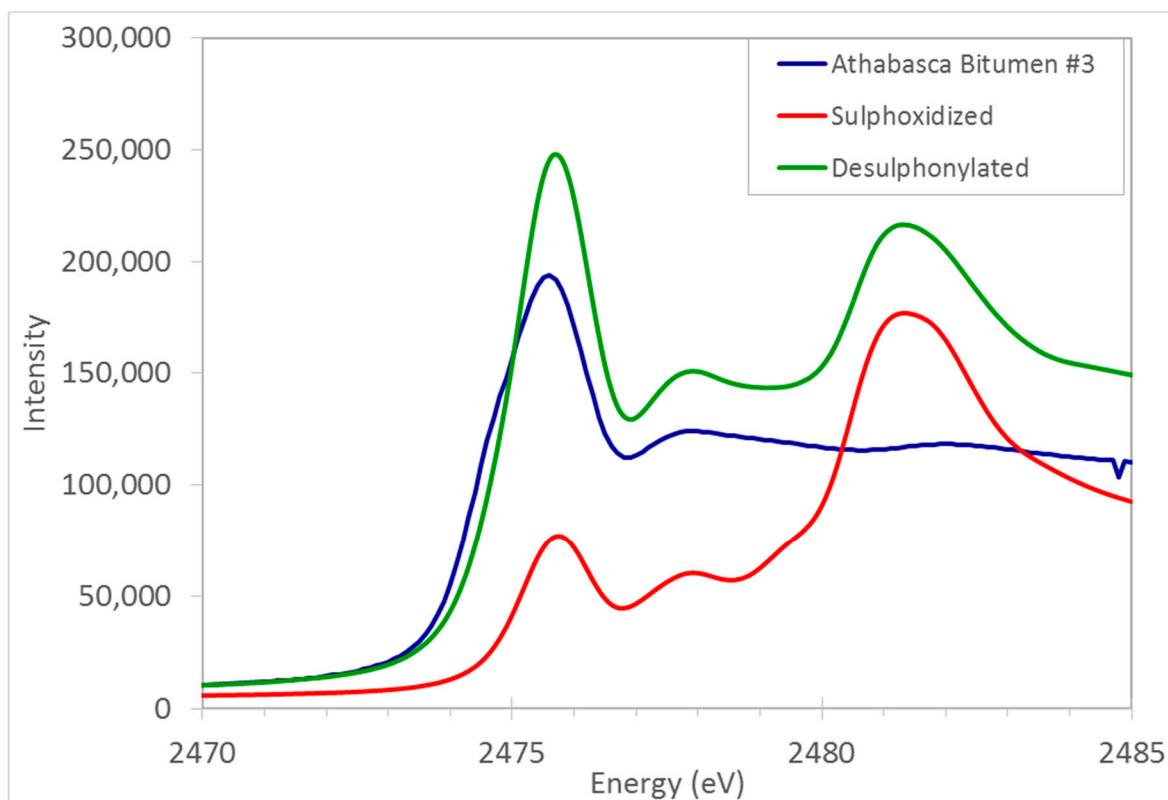**Figure S7.** XANES Spectra of Athabasca Bitumen #3.

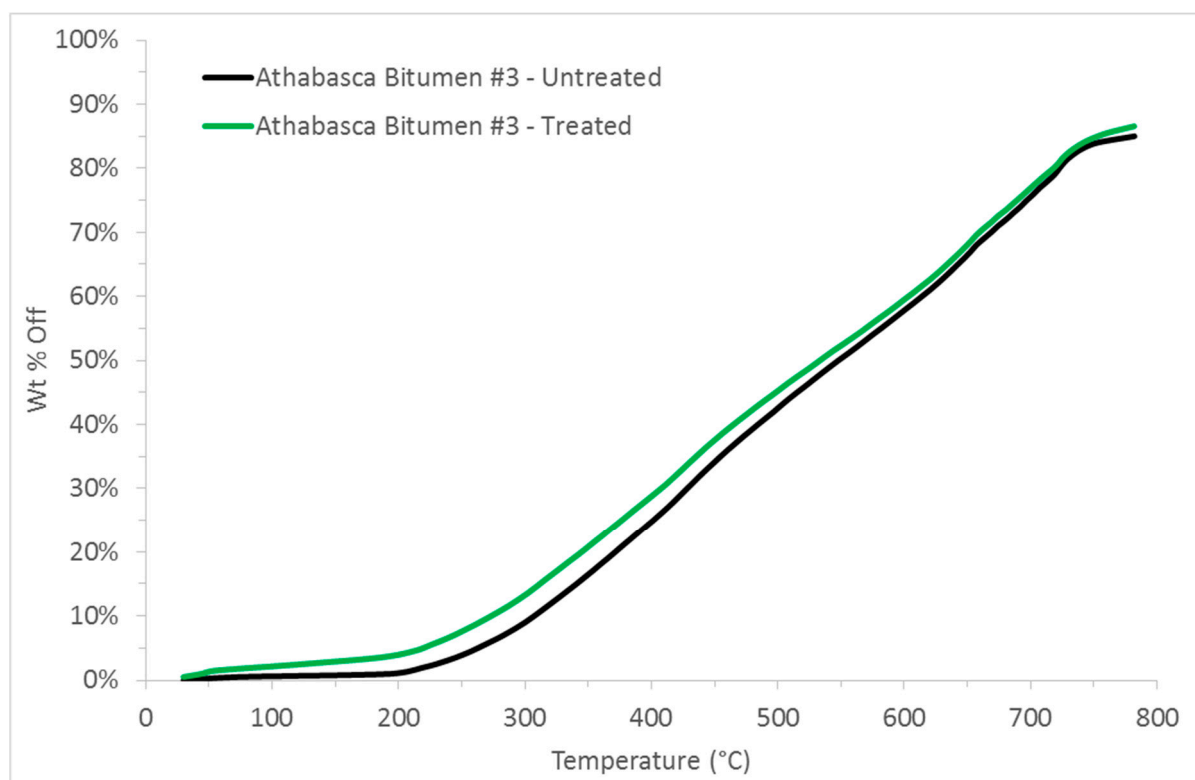

**Figure S8.** HT-SIMDIS (ASTM D7169) of Athabasca Bitumen #3, before treatment, and after sulfoxidation/desulfonylation.
